# Supplementary material for: NMR Structure in methanol of a β-hexapeptide with a disulfide clamp
Source: Royal Society of Chemistry journal article supplement (doi:10.1039/b007503p), 2000-01-01
Supplement: b007503p.doc [file b007503p.doc]

**Supplementary Information**

*NMR Spectroscopy of hexapeptide* **1***:* Sample: 9 mg **1** dissolved in 0.6 ml CD3OH. **1D-NMR** (AMX500): 1H-NMR (500 MHz): suppression of the CD3O*H* signal by presaturation; 90K data points, 64 scans, 5.6 s acquisition time. {1H}-BB-decoupled-13C-NMR (125 MHz): 80 K data points, 27 K scans, 1.3 s acquisition time,1s relax. delay 45° excitation pulse. Processed with 1.0 Hz exponential line broadening. **2D-NMR:** All with solvent suppression by presat. DQF.COSY (500 MHz, CD3OH) with pulsed field gradients (PFG) for coherence pathway selection [1]: *Acquisition:* 2K(t2) x 512 (t1) data points. 8 scans per t1 increment, 0.17 s acquisition time in t2; relaxation delay 2.0 s. TPPI quadrature detection in 1. *Processing:* Zero filling and FT to 1K x 1K real/real datapoints after multiplication with sin2 filter shifted by /3 in 2 and /2 in 1. HSQC with PFG [2] (500, 125 MHz, CD3OH): *Acquisition:* 2K(t2) x 512 (t1) data points, 48 scans per t1 increment. 13C-GARP decoupling during t2. 0.17 s acq. time in t2. *Processing:* Zero filling and FT to 1K x 1K real/real datapoints after multiplication with sin2 filter shifted by /2 in 2 and sin filter shifted by /2 in 1. HMBC with PFG [3] (500, 125 MHz, CD3OH): *Acquisition:* Delay for evolution of long range antiphase magn. 50 ms. No 13C-decoupling, otherwise identical to parameters for HSQC. *Processing:* Zero filling and FT to 1K x 1K after multiplication with cos2 filter in 2 and gaussian filter in 1; power spectrum in both dimensions. ROESY [4] (500 MHz, CD3OH) (see *Table 3*). *Acquisition:* 2 ROESY spectra with mixing times of 80 and 150 ms were acquired. CW-spin lock (3.8 kHz) between trim pulses, 2K(t2) x 480 (t1) datapoints, 64 scans per t1-increment. 0.17 s acqu. time in t2, other parameters identical to DQF.COSY. *Processing:* Zero filling and FT to 1K x 512K real/real datapoints after multiplication by cos2 filter in 2 and 1. Baseline correction with 3rd degree polynomial in both dimensions.

*NMR Structure Determination:* Calculations were performed using *X-PLOR 3.581* [5] on a *Silicon Graphics O2* *(R 10000)* workstation under *Irix 6.3*. Visualisation was carried out using MolMol[6], see *Fig.4*.

Thesimulated annealing protocol of *Quanta 98*, *X-PLOR 3.851* was used to generate the structures starting from a given helical conformation. Initial time: 1000 K, 6000 high steps, 3000 cooling steps, 1.5 fs time step, all other parameters were left unchanged. The resulting structures converged to a left-handed helical structure. A final refinement using the refine.inp, starting temp. 300 k, 1 ps time step yielded 25 structures. The obtained structures were analysed using the analyze protocol with the following acceptance criteria: No NOE violations > 0.4 Å, rms difference for bond deviations from ideality < 0.01 Å, rms difference for angle deviations from ideality < 2 °. 20 structures fulfilled this test. We chose this bundle of 20 structures (*Fig. 4*) as representative for the structure in solution.

[1] A.L. Davis, E.D. Laue, J. Keeler, D. Moskau, J. Lohman, *J. Magn. Reson.* **1991**, *94*, 637.

[2] A.L. Davis, J. Keeler, E.D. Laue, D. Moskau, *J. Magn. Reson*. **1992**, *98*, 207.

[3] W. Willker, D. Leibfritz, R. Kerssebaum, W. Bermel, *Magn. Reson.* *Chem*. **1993**, *31*, 287.

[4] C. Griesinger, R.R. Ernst, *J. Magn. Reson.* **1987**, *75*, 261.

5 A.T. Brünger, in ‘X-PLOR Manual V3.0’, Eds. Y. University, New Haven, 1992.

[6 R. Koradi, M. Billeter, K. Wüthrich, *J. Mol. Graphics* **1996**, *14*, 51.

**1H-NMR Chemical Shifts of the -hexapeptide 3 in Methanol**

| **-Amino acid** | **NH** | **2H-C()** | **H-C()** | **H-C(), 2H-C() or Me-C()** | **Me-C() or H-C()** | **Me-C()** |
| --- | --- | --- | --- | --- | --- | --- |
| Val1 | - | 2.62/2.53 | 3.42 | 2.00 | 1.04 |  |
| Cys2 | 8.29 | 2.61/2.46 | 4.36 | 3.02/3.02 |  |  |
|  | (*J*(NH, ) = 8.24 |  |  |  |  |  |
| Leu3 | 7.91 | 2.42/2.42 | 4.32 | 1.45/1.27 | 1.60 | 0.91 |
|  | (*J*(NH, ) = 8.98 |  |  |  |  |  |
| Ser4 | 7.96 | 2.53/2.43 | 4.35 | 3.53/3.51 |  |  |
|  | (*J*(NH, ) = 8.37 |  |  |  |  |  |
| Val5 | 7.79 | 2.46/2.28 | 4.06 | 1.80 | 0.92 |  |
|  | (*J*(NH, ) = 9.11 |  |  |  |  |  |
| Cys6 | 7.99 | 2.60/2.38 | 4.45 | 2.92/2.92 |  |  |
|  | (*J*(NH, ) = 8.01 |  |  |  |  |  |
| Leu7 | 7.84 | 2.44/2.44 | 4.33 | 1.46/1.32 | 1.61 | 0.93 |
|  | (*J*(NH, ) = 8.74 |  |  |  |  |  |

**1H-NMR Chemical Shifts of the -hexapeptide 1 in Methanol**

| **-Amino acid** | **NH** | **2H-C()** | **H-C()** | **H-C(), 2H-C() or Me-C()** | **Me-C() or H-C()** | **Me-C()** |
| --- | --- | --- | --- | --- | --- | --- |
| Val1 | - | 2.65ax/2.50la | 3.51 | 2.05 | 1.06/1.06 |  |
| Cys2 | 8.84 | 2.96ax/2.42la | 4.62 | 3.22/3.09 |  |  |
|  | (*J*(NH, ) = 8.0 |  |  |  |  |  |
| Leu3 | 8.08 | 2.43la/2.34ax | 4.50 | 1.40/1.26 | 1.56 | 0.93/0.93 |
|  | (*J*(NH, ) = 9.23 |  |  |  |  |  |
| Val4 | 7.76 | 2.51la/2.39ax | 4.14 | 1.65 | 0.87/0.87 |  |
|  | (*J*(NH, ) = 9.72 |  |  |  |  |  |
| Cys5 | 8.01 | 2.78la/2.32ax | 4.59 | 3.04/2.34 |  |  |
|  | (*J*(NH, ) = 7.38 |  |  |  |  |  |
| Leu6 | 7.93 | 2.46ax/2.46la | 4.38 | 1.46/1.33 | 1.62 | 0.92 |
|  | (*J*(NH, ) = 9.35 |  |  |  |  |  |

| Table . *Weak (4.5 Å), Medium (3.5 Å) and Strong (3.0 Å) NOE’s observed* | | | | | | |  |  |  |  |  |  |
| --- | --- | --- | --- | --- | --- | --- | --- | --- | --- | --- | --- | --- |
| *in the ROESY NMR Spectrum of disulfide-bridged Heptapeptide* ***3*** *in Methanol* | | | | | | |
|  |  |  |  |  | | |
| Residue | H-Atom(s) | Residue | H-Atom(s) | NOE | | |
| **1** | **b** | **1** | a | **weak** |  |  |
| **1** | **b** | **1** | **g** | **medium** |  |  |
| **1** | **b** | **1** | d | **medium** |  |  |
| **1** | **b** | **3** | **b** | **weak** |  |  |
| **2** | **NH** | **6** | **b** | **weak** |  |  |
| **2** | **NH** | **5** | **b** | **medium** |  |  |
| **2** | **NH** | **2** | **g** | **strong** |  |  |
| **2** | **NH** | **1** | a | **strong** |  |  |
| **2** | **NH** | **1** | a | **medium** |  |  |
| **2** | **NH** | **1** | **me** | **weak** |  |  |
| **2** | **NH** | **3** | **me** | **weak** |  |  |
| **2** | **b** | **2** | a | **strong** |  |  |
| **2** | **b** | **3** | a | **medium** |  |  |
| **2** | **g** | **2** | a | **medium** |  |  |
| **3** | **NH** | **6** | **b** | **weak** |  |  |
| **3** | **NH** | **3** | **b** | **medium** |  |  |
| **3** | **NH** | **4** | **g** | **medium** |  |  |
| **3** | **NH** | **2** | **g** | **medium** |  |  |
| **3** | **NH** | **2** | a | **weak** |  |  |
| **3** | **NH** | **3** | a | **medium** |  |  |
| **3** | **b** | **4** | **g** | **medium** |  |  |
| **3** | **b** | **4** | a | **medium** |  |  |
| **3** | a | **3** | **g** | **medium** |  |  |
| **3** | a | **3** | **g** | **medium** |  |  |
| **3** | a | **3** | **d** | **weak** |  |  |
| **4** | **NH** | **5** | **b** | **strong** |  |  |
| **4** | **NH** | **6** | a | **weak** |  |  |
| **4** | **NH** | **3** | a | **strong** |  |  |
| **4** | **NH** | **3** | **d** | **medium** |  |  |
| **4** | **NH** | **3** | **g** | **medium** |  |  |
| **4** | **b** | **4** | a | **weak** |  |  |
| **4** | **b** | **3** | **d** | **medium** |  |  |
| **4** | **g** | **4** | a | **medium** |  |  |
| **4** | **g** | **5** | **me** | **medium** |  |  |
| **5** | **NH** | **5** | **b** | **medium** |  |  |
| **5** | **NH** | **5** | a | **medium** |  |  |
| **5** | **NH** | **5** | a | **strong** |  |  |
| **5** | **NH** | **5** | **g** | **medium** |  |  |
| **5** | **NH** | **4** | a | **medium** |  |  |
| **5** | **b** | **2** | **g** | **medium** |  |  |
| **5** | **b** | **6** | a | **weak** |  |  |
| **5** | **b** | **4** | **g** | **weak** |  |  |
| **5** | **b** | **5** | a | **medium** |  |  |
| **5** | a | **5** | **g** | **medium** |  |  |
| **5** | a | **5** | **me** | **medium** |  |  |
| **6** | **NH** | **6** | **b** | **medium** |  |  |
| **6** | **NH** | **5** | **b** | **medium** |  |  |
| **6** | **NH** | **6** | a | **medium** |  |  |
| **6** | **NH** | **6** | **g** | **weak** |  |  |
| **6** | **NH** | **5** | a | **medium** |  |  |
| **6** | **NH** | **2** | **g** | **weak** |  |  |
| **6** | **b** | **2** | **g** | **medium** |  |  |
| **6** | **b** | **6** | a | **medium** |  |  |
| **6** | **b** | **6** | **g** | **strong** |  |  |
| **6** | **g** | **6** | a | **medium** |  |  |
| **7** | **NH** | **6** | **b** | **medium** |  |  |
| **7** | **NH** | **7** | **b** | **medium** |  |  |
| **7** | **NH** | **6** | a | **weak** |  |  |
| **7** | **NH** | **6** | **g** | **weak** |  |  |
| **7** | **NH** | **7** | **g** | **medium** |  |  |
| **7** | **NH** | **7** | **d** | **weak** |  |  |
| **7** | **b** | **7** | a | **weak** |  |  |
|  |  |  |  |  |  |  |

| Table . *Weak (4.5 Å), Medium (3.5 Å) and Strong (3.0 Å) NOE’s observed* | | | | | |  |  |  |  |  |
| --- | --- | --- | --- | --- | --- | --- | --- | --- | --- | --- |
| *in the ROESY NMR Spectrum of Compound* ***1*** *in Methanol* | | | | | |
|  |  |  |  |  |  |
| Residue | H-Atom(s) | Residue | H-Atom(s) | NOE |  |
| **1** | **b** | **1** | ala | **medium** |  |
| **1** | **b** | **1** | **g** | **strong** |  |
| **1** | **b** | **1** | d | **strong** |  |
| **2** | **NH** | **1** | **b** | **medium** |  |
| **2** | **NH** | **1** | ala | **medium** |  |
| **2** | **NH** | **1** | aax | **strong** |  |
| **2** | **NH** | **2** | **g** | **weak** |  |
| **2** | **NH** | **2** | aax | **strong** |  |
| **2** | **NH** | **5** | **g*** | **strong** |  |
| **2** | **NH** | **3** | ala | **medium** |  |
| **2** | **NH** | **4** | **b** | **weak** |  |
| **2** | **NH** | **2** | **b** | **weak** |  |
| **2** | **NH** | **5** | **b** | **medium** |  |
| **2** | **b** | **2** | **g*** | **medium** |  |
| **2** | **b** | **2** | ala | **medium** |  |
| **2** | **b** | **2** | **g** | **medium** |  |
| **3** | **NH** | **2** | **b** | **medium** |  |
| **3** | **NH** | **3** | **b** | **medium** |  |
| **3** | **NH** | **3** | aax | **medium** |  |
| **3** | **NH** | **3** | ala | **medium** |  |
| **3** | **NH** | **2** | aax | **strong** |  |
| **3** | **NH** | **5** | **b** | **weak** |  |
| **3** | **NH** | **3** | **g** | **weak** |  |
| **3** | **NH** | **3** | **g** | **medium** |  |
| **3** | **NH** | **3** | **d** | **weak** |  |
| **3** | **b** | **3** | aax | **weak** |  |
| **3** | **b** | **3** | ala | **medium** |  |
| **3** | **b** | **3** | **g** | **weak** |  |
| **3** | **b** | **3** | **g** | **medium** |  |
| **3** | **b** | **3** | **e** | **medium** |  |
| **4** | **NH** | **4** | ala | **weak** |  |
| **4** | **NH** | **4** | aax | **medium** |  |
| **4** | **NH** | **4** | **g** | **weak** |  |
| **4** | **NH** | **4** | **b** | **weak** |  |
| **4** | **NH** | **3** | ala | **medium** |  |
| **4** | **NH** | **3** | aax | **strong** |  |
| **4** | **NH** | **4** | **d** | **medium** |  |
| **4** | **NH** | **6** | ala | **medium** |  |
| **4** | **b** | **3** | aax | **weak** |  |
| **4** | **b** | **4** | aax | **medium** |  |
| **4** | **b** | **1** | aax | **weak** |  |
| **4** | **b** | **1** | **g** | **medium** |  |
| **4** | **b** | **4** | **d** | **strong** |  |
| **5** | **NH** | **4** | **b** | **weak** |  |
| **5** | **NH** | **5** | **b** | **medium** |  |
| **5** | **NH** | **5** | ala | **weak** |  |
| **5** | **NH** | **5** | aax | **medium** |  |
| **5** | **NH** | **4** | aax | **medium** |  |
| **5** | **NH** | **5** | **g*** | **medium** |  |
| **5** | **b** | **5** | ala | **medium** |  |
| **5** | **b** | **5** | **g** | **medium** |  |
| **5** | **b** | **2** | aax | **medium** |  |
| **6** | **NH** | **6** | **b** | **medium** |  |
| **6** | **NH** | **5** | ala | **strong** |  |
| **6** | **NH** | **6** | **g** | **medium** |  |
| **6** | **NH** | **6** | **g** | **weak** |  |
| **6** | **NH** | **6** | **d** | **weak** |  |
| **6** | **NH** | **6** | **e** | **weak** |  |
| **6** | **b** | **6** | ala | **weak** |  |
| **6** | **b** | **6** | **g** | **medium** |  |
| **6** | **b** | **6** | **g** | **weak** |  |
| **6** | **b** | **6** | **d** | **weak** |  |
|  |  |  |  |  |  |
